# Supplementary material for: Disturbance Regimes Predictably Alter Diversity in an Ecologically Complex Bacterial System
Source: PubMed Central journal article supplement (PMC5181773; doi:10.1128/mbio.01372-16), 2016-12-20
Supplement: mbo006163113sf5.pdf [file mbo006163113sf5.pdf]

# UV Radiation

5 min.

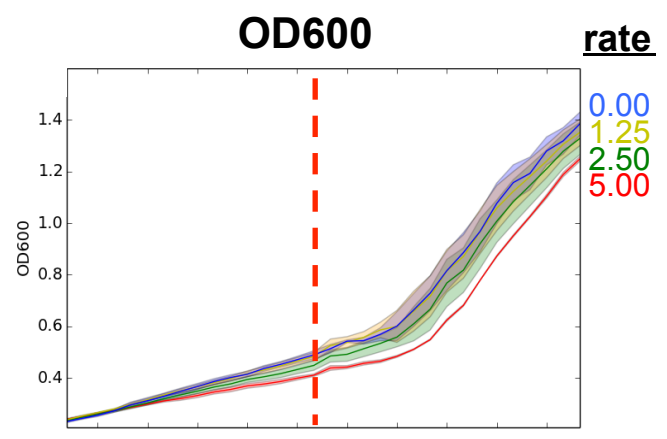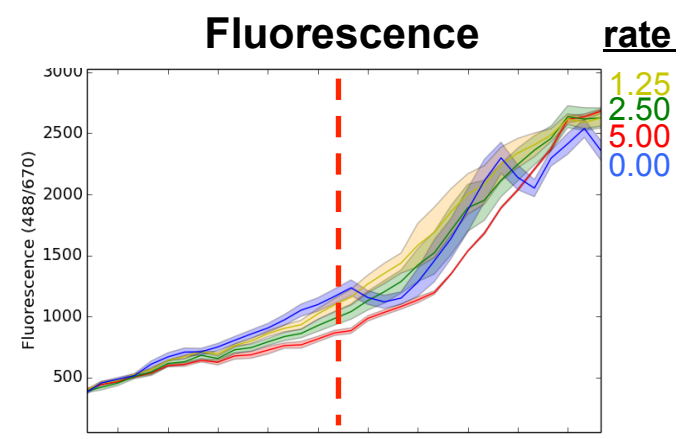

10 min.

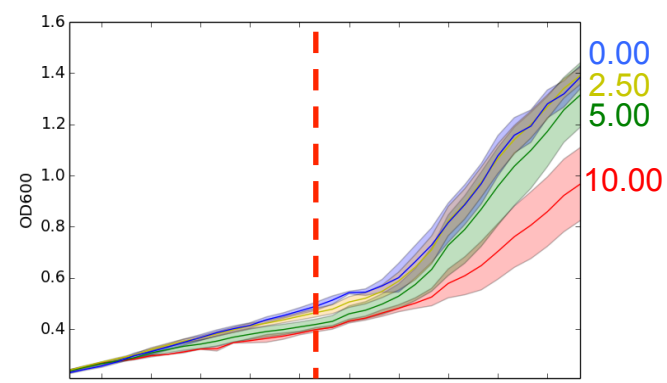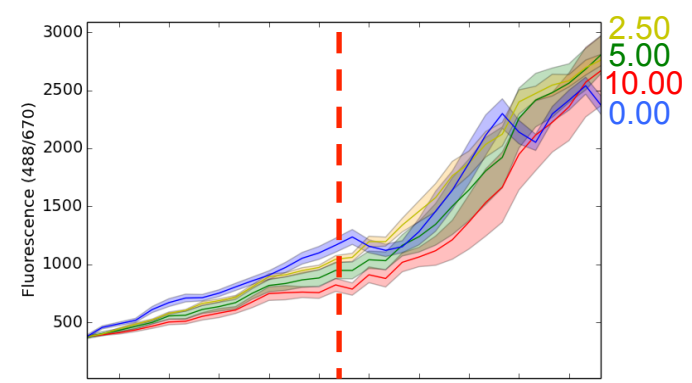

15 min.

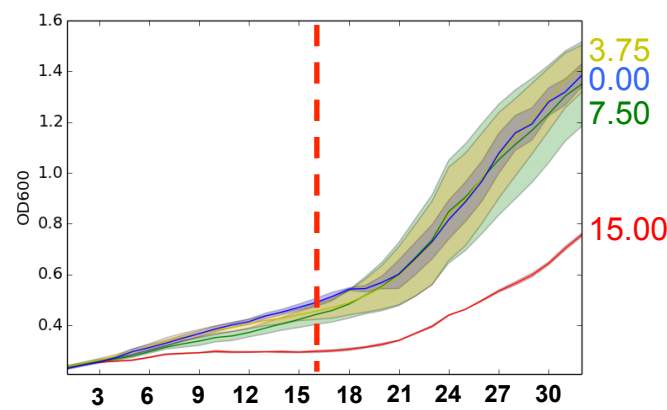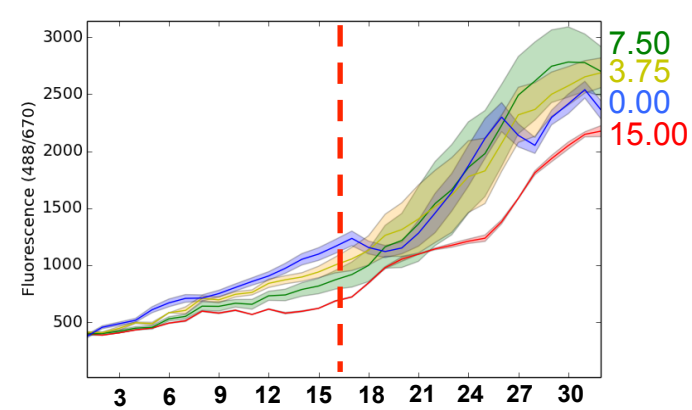

Days

Days
