# Supplementary material for: Disturbance Regimes Predictably Alter Diversity in an Ecologically Complex Bacterial System
Source: PubMed Central journal article supplement (PMC5181773; doi:10.1128/mbio.01372-16), 2016-12-20
Supplement: mbo006163113sf6.pdf [file mbo006163113sf6.pdf]

# OD600

## rate

# Fluorescence

## rate

20 min. (1X)

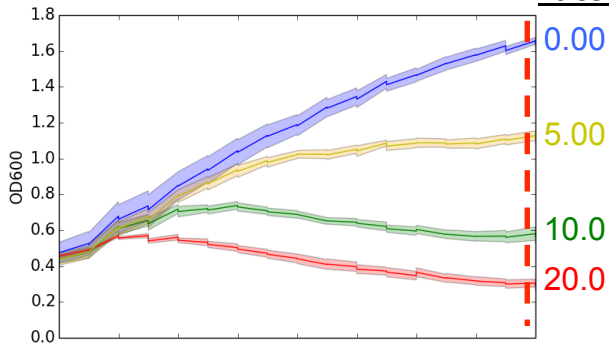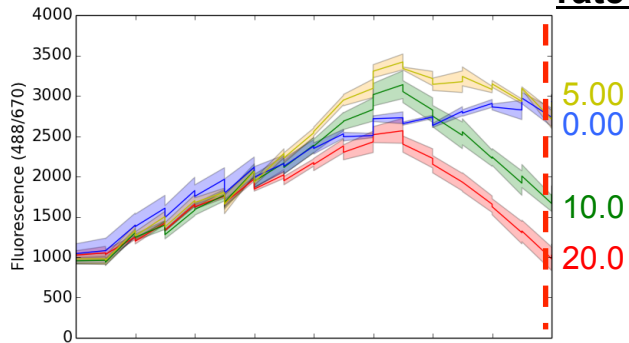

40 min. (8X)

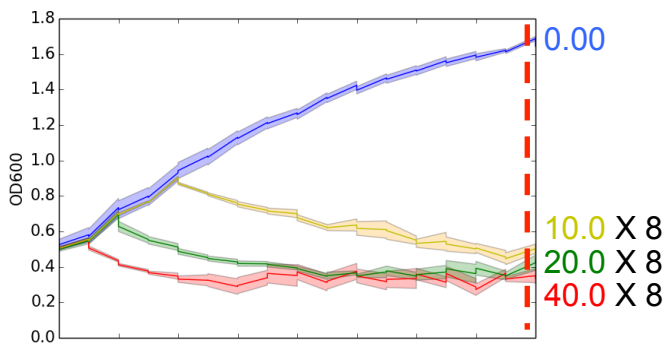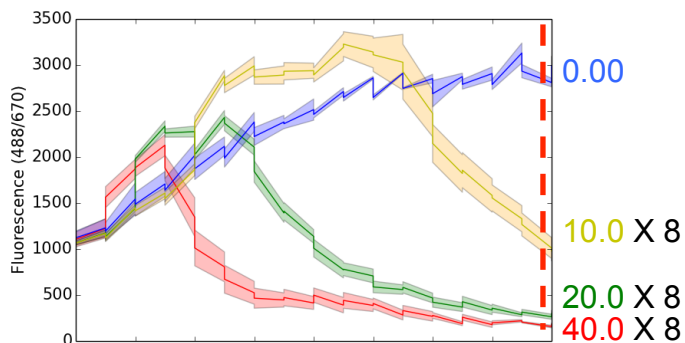

60 min. (8X)

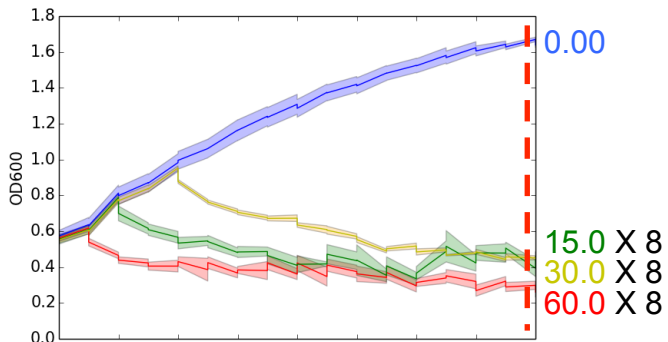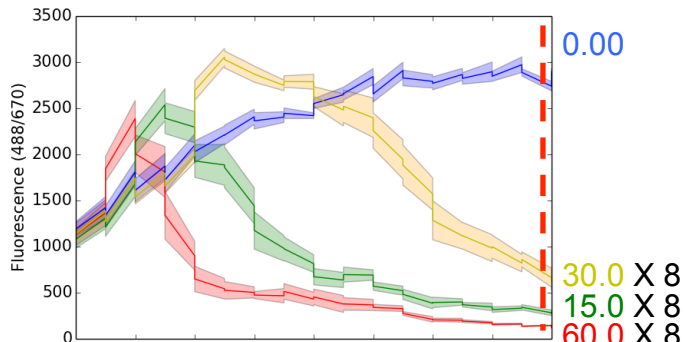

Days

Days
