# Supplementary material for: Disturbance Regimes Predictably Alter Diversity in an Ecologically Complex Bacterial System
Source: PubMed Central journal article supplement (PMC5181773; doi:10.1128/mbio.01372-16), 2016-12-20

**A.**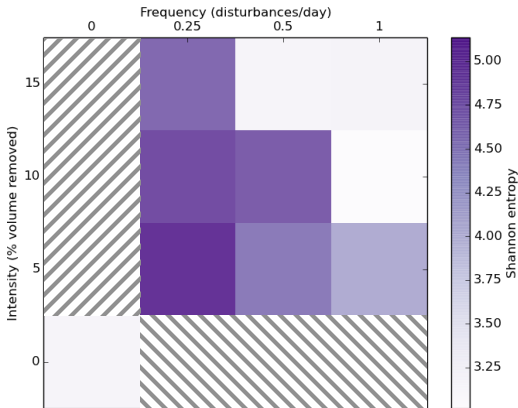**B.**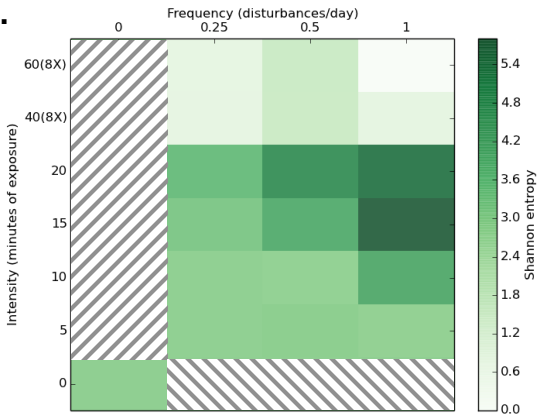

Supplement: mbo006163113sf7.pdf [file mbo006163113sf7.pdf]
